# Supplementary material for: Effect of Exercise on Quality of Life in Parkinson's Disease: A Systematic Review and Meta-Analysis
Source: Parkinsons Dis. 2020 Jul 9;2020:3257623. doi: 10.1155/2020/3257623 (PMC7368221; doi:10.1155/2020/3257623)
Supplement: Supplementary Materials — Appendix 1: search strategy. Appendix 2. (A) Risk of the bias graph: review authors' judgments about each risk of the bias item, presented as percentage across all included studies. (B) Risk of bias summary: review authors' judgments about each risk of the bias item for each included study. Appendix 3. The subgroup analysis according to scales for assessing life quality. Appendix 4. Sensitivity analysis. Appendix 5. Funnel plot. [file 3257623.f1.zip]

Archive with 1 entries (1 files):
- Supplementary Materials.rar
